# Supplementary material for: BAFF and APRIL counterregulate susceptibility to inflammation-induced preterm birth
Source: PubMed Central journal article supplement — Cell Rep. Author manuscript; Available in PMC 2023 Oct 23. (PMC10551044; doi:10.1016/j.celrep.2023.112352), 2023-04-05
Supplement: NIHMS1895591-supplement-1.pdf [file NIHMS1895591-supplement-1.pdf]

**Supplemental information**

**BAFF and APRIL counterregulate susceptibility  
to inflammation-induced preterm birth**

**Jessica R. Doll, Maria E. Moreno-Fernandez, Traci E. Stankiewicz, Jennifer L. Wayland, Adrienne Wilburn, Benjamin Weinhaus, Claire A. Chougnnet, Daniela Giordano, Monica Cappelletti, Pietro Presicce, Suhas G. Kallapur, Nathan Salomonis, Tamara Tilburgs, and Senad Divanovic**

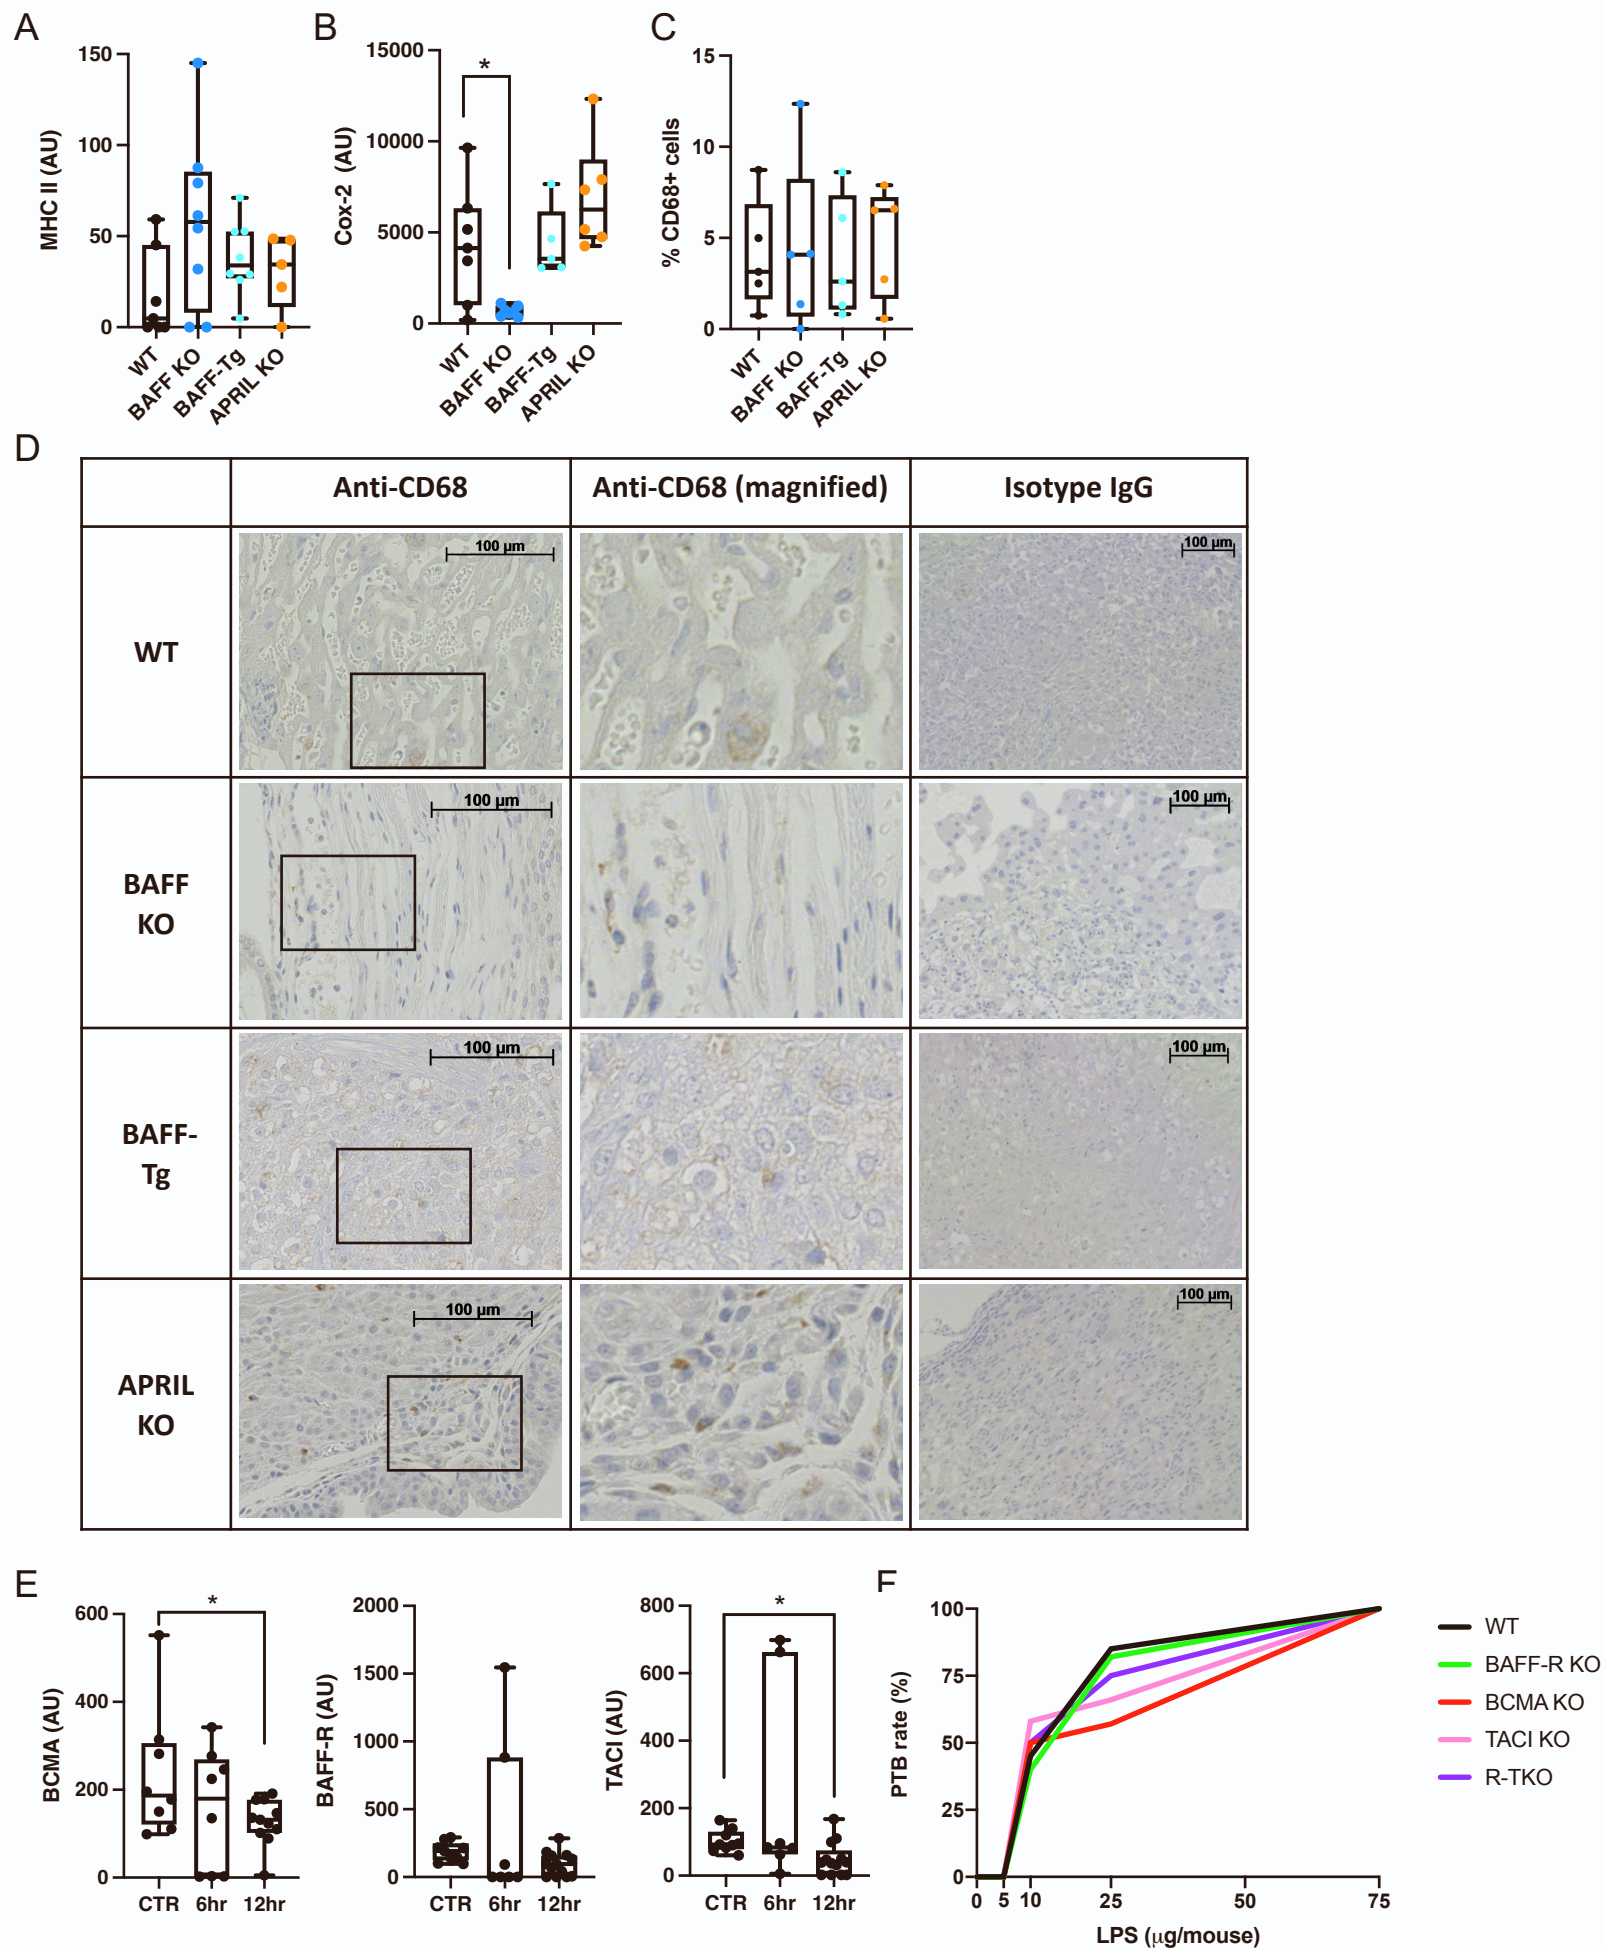

Supplementary Figure 1. BAFF contributes to induction of parturition, Related to Figure 2.

**Supplementary Figure 1. BAFF contributes to induction of parturition, Related to Figure 2.**

(A) Decidua/myometrium *Ciita* (MHC II) mRNA expression in WT, BAFF deficient, BAFF-Tg, and APRIL deficient mice 6 hours following 75 µg LPS challenge (n = 4-8/condition).

(B) Decidua/myometrium *Ptgs2* (Cox-2) mRNA expression in WT, BAFF deficient, BAFF-Tg, and APRIL deficient mice 6 hours following 75 µg LPS challenge. Student's t-test \*p<0.05.

(C) Quantification of CD68 positive cells out of total nuclei from immunohistochemical detection in WT, BAFF deficient, BAFF-Tg, and APRIL deficient mouse myometrium/decidua/placenta 6 hours following saline (non-stimulated) injection (n = 3-4/condition).

(D) Immunohistochemical detection of CD68 (left and middle columns) or isotype control (right column) in WT, BAFF deficient, BAFF-Tg, and APRIL deficient mouse myometrium/decidua/placenta 6 hours following 75 µg LPS challenge (n = 3/condition). Left: Representative image, 20X objective. Middle: Indicated region of left image magnified to show detail (boxed region). Right: Representative isotype control image, 10X objective.

(E) Decidua/myometrium *Tnfrsf13c* (BAFF-R), *Tnfrsf17* (BCMA), and *Tnfrsf13b* (TACI) mRNA expression in WT mice 6 hours following 75 µg LPS challenge or saline injection (CTR) (n = 7-13/condition). Student's t-test \*p<0.05.

(F) Gravid WT, BAFF-R deficient, BCMA deficient, TACI deficient, and BAFF-R/BCMA/TACI deficient (R-TKO) mice were injected intraperitoneally with LPS on day of 16 gestation and incidence of PTB was quantified (n = 4-24/condition). Chi-square (2x5 matrix): p=0.6820.

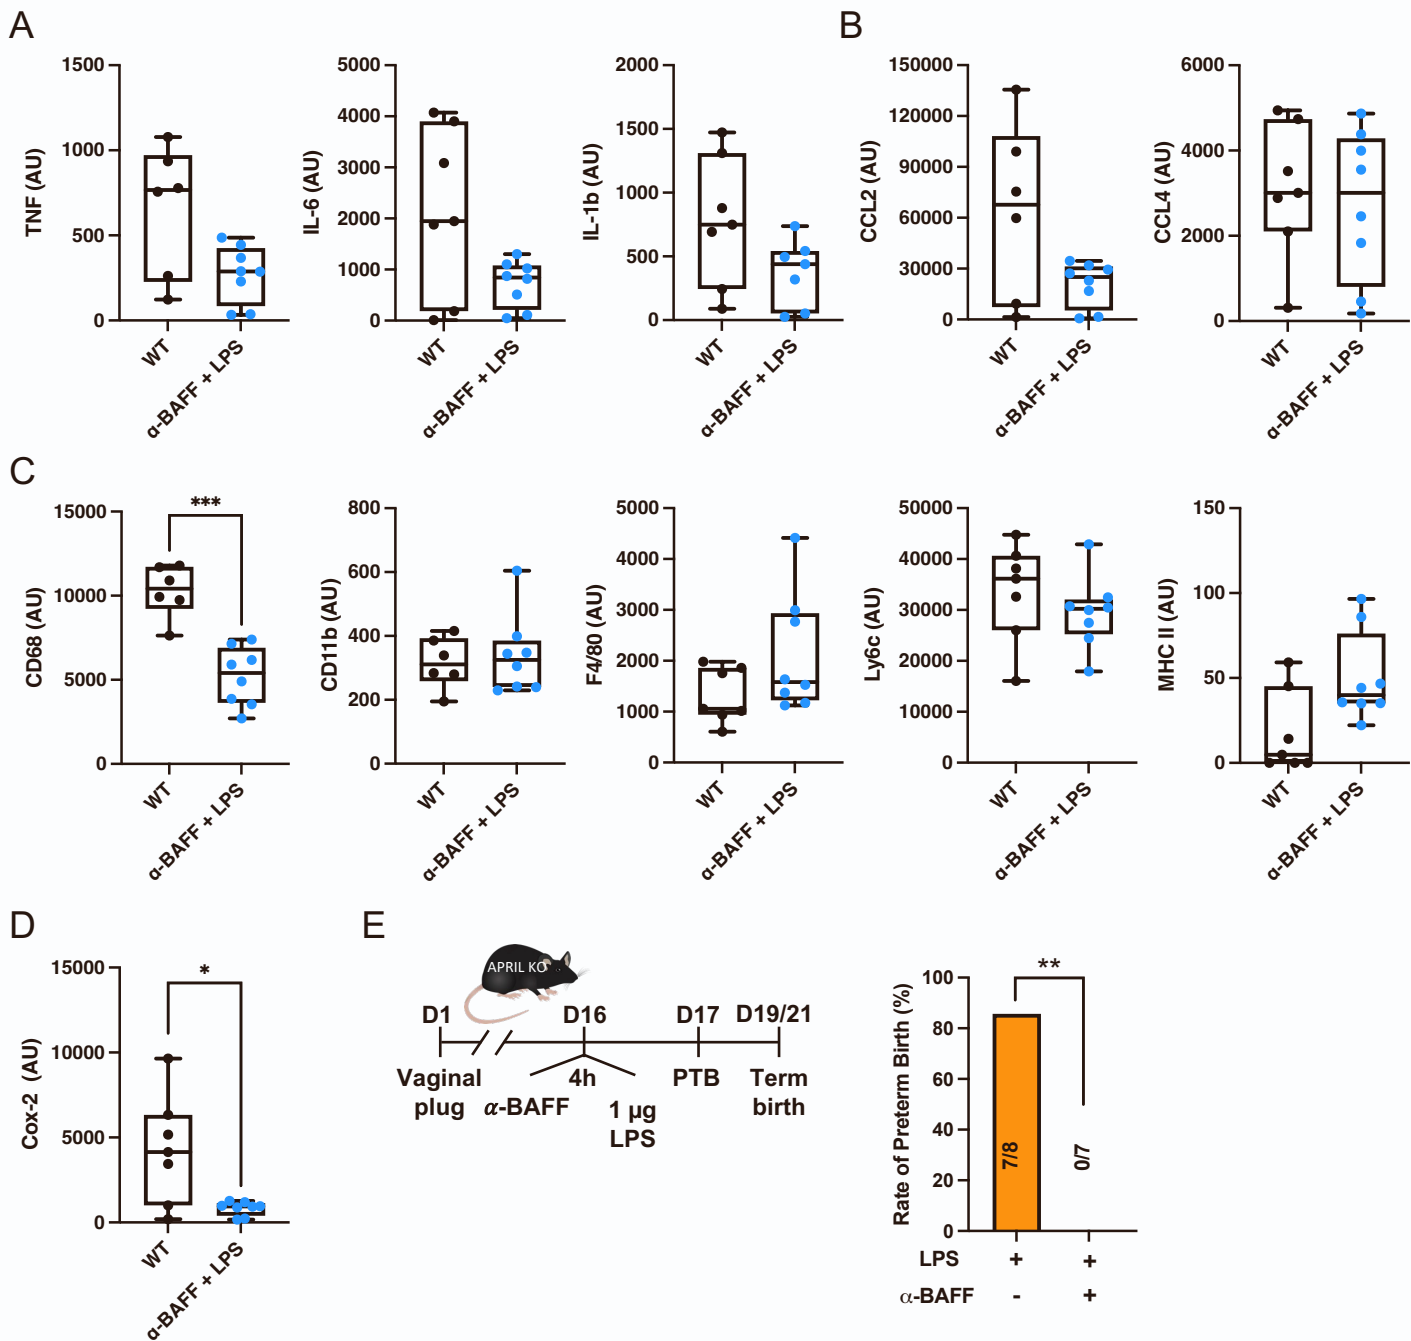

**Supplementary Figure 2. Anti-BAFF treatment reduces induction of inflammatory signaling in the uterus, Related to Figure 3.**

**Supplementary Figure 2. Anti-BAFF treatment reduces induction of inflammatory signaling in the uterus, Related to Figure 3.**

(A) Decidua/myometrium *Tnf*, *Il6*, and *Il1b* mRNA expression in WT mice treated with anti-BAFF (2  $\mu$ g/g) for 4 hours prior to 75  $\mu$ g LPS challenge for 6 hours. Data compared to WT mice treated with LPS alone (n = 6-8/condition).

(B) Decidua/myometrium *Ccl2* and *Ccl4* mRNA expression in WT mice treated with anti-BAFF (2  $\mu$ g/g) for 4 hours prior to 25  $\mu$ g LPS challenge for 6 hours. Data compared to WT mice treated with LPS alone (n = 6-8/condition).

(C) Decidua/myometrium *Cd68*, *Cd11b*, *Adgre1* (F4/80), *Ly6c*, and *Ciita* (MHC II) mRNA expression in WT mice treated with anti-BAFF (2  $\mu$ g/g) for 4 hours prior to 25  $\mu$ g LPS challenge for 6 hours. Data compared to WT mice treated with LPS alone (n = 6-8/condition).

(D) Decidua/myometrium *Ptgs2* (Cox-2) mRNA expression in WT mice treated with anti-BAFF (2  $\mu$ g/g) for 4 hours prior to 25  $\mu$ g LPS challenge for 6 hours. Data compared to WT mice treated with LPS alone (n = 6-8/condition).

(E) Gravid APRIL deficient mice were injected intraperitoneally, on day 16 of gestation, with anti-BAFF (2  $\mu$ g/g) and 4 hours later were challenged with 1  $\mu$ g LPS. Incidence of PTB was quantified. Fisher's exact test p=0.0014.

(A-D) Student's t-test \*p<0.05, \*\*p<0.01.

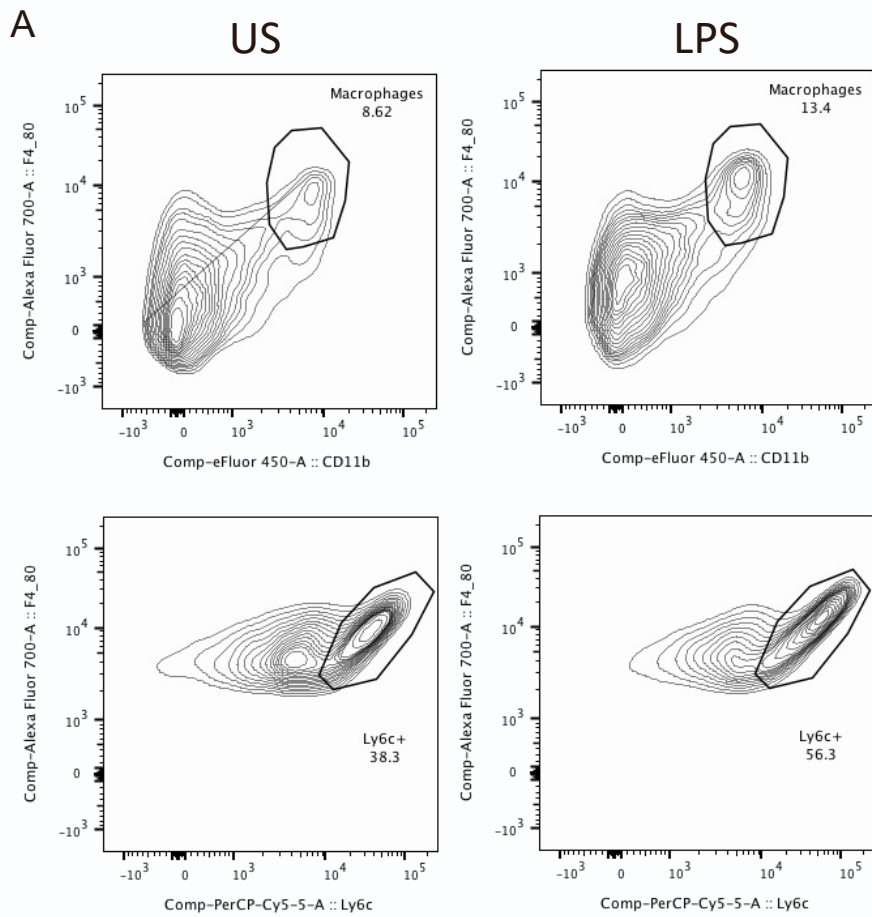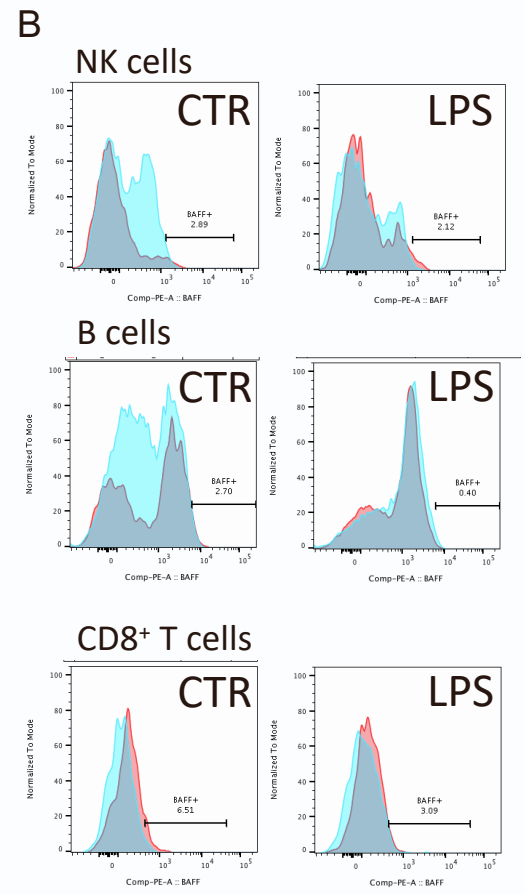

**C**

| Sample        | RIN  |
|---------------|------|
| WT LPS1       | 7.30 |
| WT LPS2       | 6.60 |
| BAFF KO LPS1  | 7.30 |
| BAFF KO LPS2  | 7.10 |
| APRIL KO LPS1 | 7.60 |
| APRIL KO LPS2 | 7.60 |

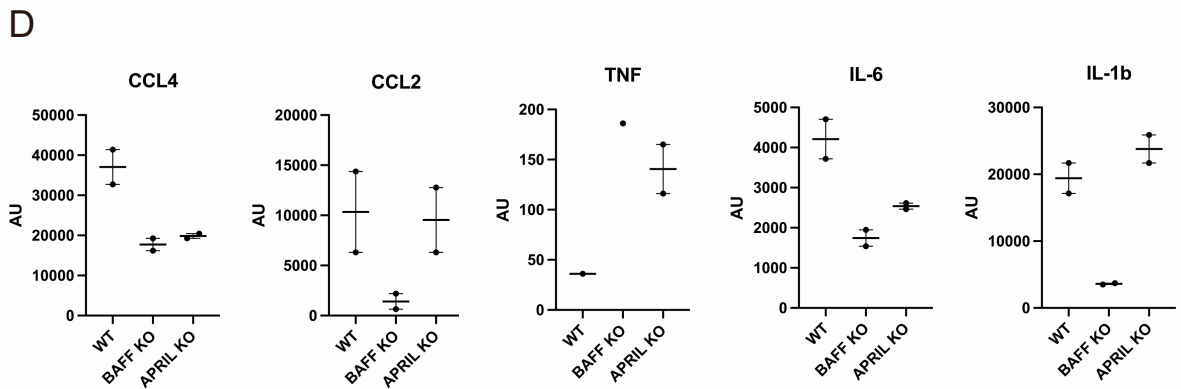

**Supplementary Figure 3. Macrophages are the primary BAFF-producing immune cell type, Related to Figure 4.**

**Supplementary Figure 3. Macrophages are the primary BAFF-producing immune cell type,  
Related to Figure 4.**

(A) Example of the gating strategy for decidua/myometrium macrophage (CD45<sup>+</sup>F4/80<sup>+</sup>CD11b<sup>+</sup>) populations and the activation marker Ly6c. Uterine tissue composed of decidua and myometrium was collected 6 hours post LPS or saline challenge (US = unstimulated) and analyzed by flow cytometry (n = 2/condition).

(B) BAFF expression levels in NK cells, B cells, and CD8<sup>+</sup> T cells measured in BAFF reporter mice (red) over WT background (blue).

(C) RNA integrity numbers for samples used in RNA Seq (see **Figure 4D-J**).

(D) RT-qPCR values for selected genes.

A

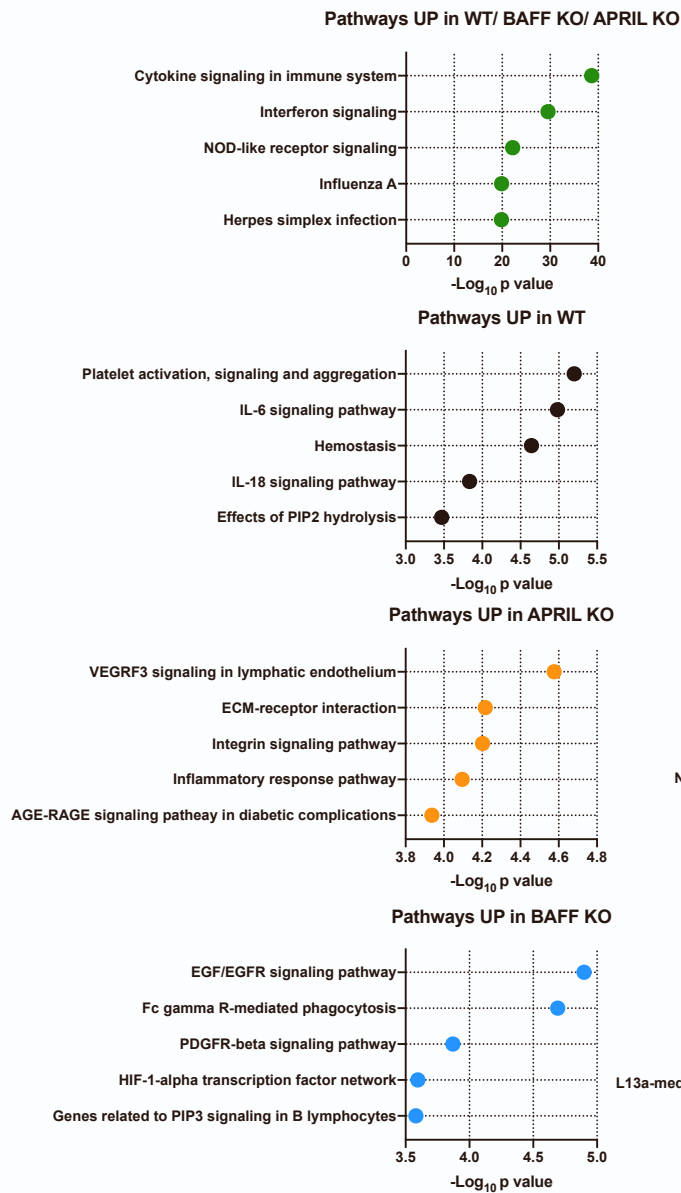

B

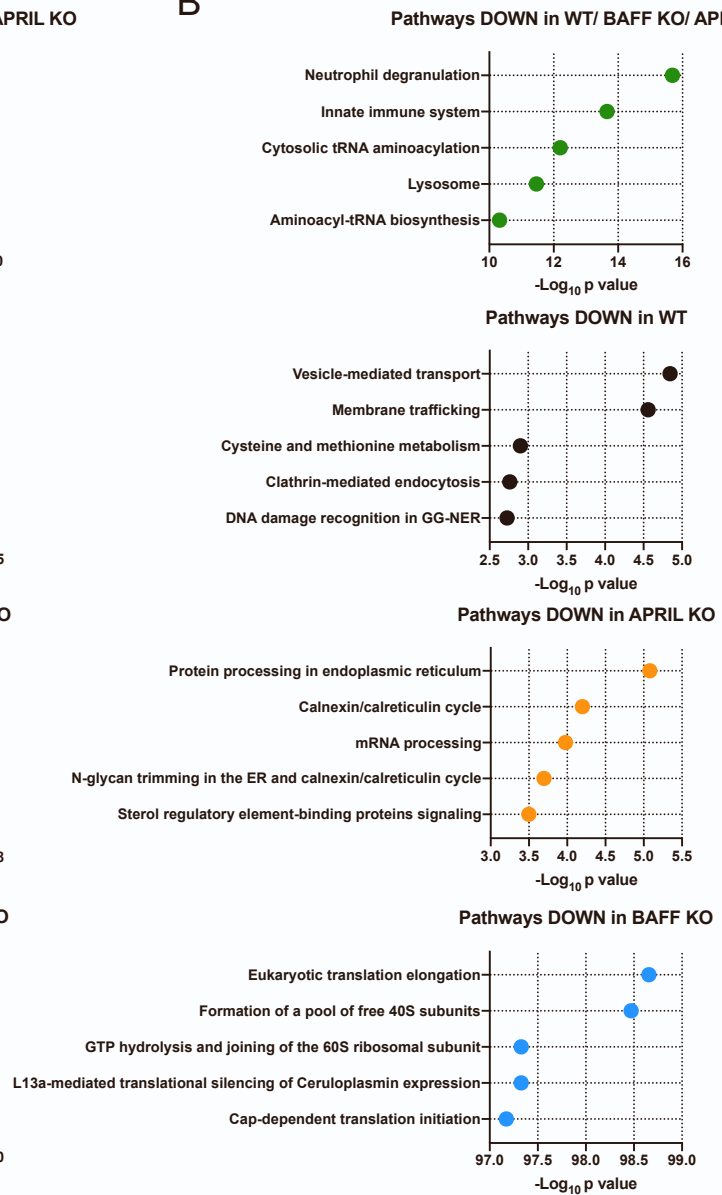

C

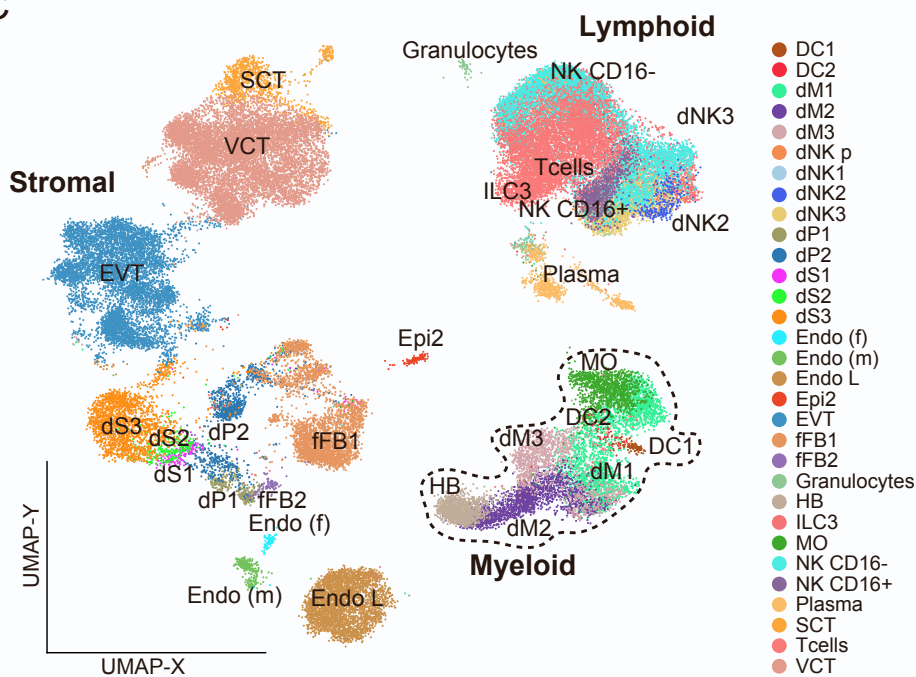

D

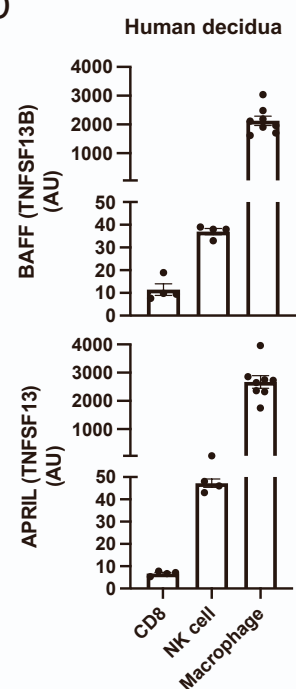

Supplementary Figure 4. Pathways up or downregulated following LPS stimulation of WT, APRIL KO, and BAFF KO macrophages, Related to Figure 4.



**Supplementary Figure 4. Pathways up or downregulated following LPS stimulation of WT, APRIL KO, and BAFF KO macrophages, Related to Figure 4.**

(A) Genes that were >1.5-fold upregulated were entered into ToppGene to identify potentially affected pathways.

(B) Genes that were >1.5-fold downregulated were entered into ToppGene to identify potentially affected pathways.

(C) UMAP of an integrated single-cell RNA-Seq dataset of term and preterm placenta from Pique-Regi et al. 2019, with cell-populations assigned from an independent placental cell atlas (Single-Cell-Portal- SCP860).

(D) BAFF and APRIL mRNA expression in first trimester human decidual tissue (n = 4-8/condition).

| Oligonucleotides          |         |                |
|---------------------------|---------|----------------|
| <i>Tnfrsf13b (Baff)</i>   | BIO RAD | qMmuCID0005110 |
| <i>Tnfrsf13 (April)</i>   | BIO RAD | qMmuCED0003844 |
| <i>Tnf</i>                | BIO RAD | qMmuCED0004141 |
| <i>β-actin</i>            | BIO RAD | qMmuCED0027505 |
| <i>Il6</i>                | BIO RAD | qMmuCID0005613 |
| <i>Il1b</i>               | BIO RAD | qMmuCID0005641 |
| <i>Cd68</i>               | BIO RAD | qMmuCED0003822 |
| <i>Ccl2</i>               | BIO RAD | qMmuCED0048300 |
| <i>Ccl4</i>               | BIO RAD | qMmuCED0003869 |
| <i>Ly6c</i>               | BIO RAD | qMmuCID0061787 |
| <i>Itgam (Cd11b)</i>      | BIO RAD | qMmuCID0005971 |
| <i>Clita (MHC II)</i>     | BIO RAD | qMmuCID0040081 |
| <i>Adgre1 (F4/80)</i>     | BIO RAD | qMmuCID0017591 |
| <i>Ptgs2 (Cox-2)</i>      | BIO RAD | qMmuCED0003742 |
| <i>Tnfrsf13c (BAFF-R)</i> | BIO RAD | qMmuCED0040620 |
| <i>Tnfrsf17 (BCMA)</i>    | BIO RAD | qMmuCID0023501 |
| <i>Tnfrsf13b (TACI)</i>   | BIO RAD | qMmuCED0045220 |

Table S4. Oligonucleotides used for gene expression analysis by RT-qPCR, Related to STAR Methods.
